# Supplementary material for: Improving accuracy of multiple sequence alignment algorithms based on alignment of neighboring residues
Source: PubMed Central journal article supplement — Nucleic Acids Res. 2008 Dec 4;37(2):463–72. doi: 10.1093/nar/gkn945 (PMC2632924; doi:10.1093/nar/gkn945), 2008-12-04
Supplement: gkn945_1.pdf [file gkn945_1.pdf]

Table S1: Percentage of cases in which the SPS and CS scores become better (the first number for each algorithm) and worse (the second number for each algorithm) on full length protein sequences in BALiBASE 3.0 when comparing the results of the modified algorithm NRAlign to the original algorithm.

| SPS             | TCoffee |       | MUSCLE |       | ProbCons |       | MUMMALS |       |
|-----------------|---------|-------|--------|-------|----------|-------|---------|-------|
| 1V1 {38}        | 44.74   | 36.84 | 60.53  | 39.47 | 47.37    | 47.37 | 10.53   | 34.21 |
| 1V2 {44}        | 65.91   | 29.55 | 75.00  | 20.45 | 54.55    | 18.18 | 36.36   | 25.00 |
| 1 (V1-V2) {82}  | 56.10   | 32.93 | 68.29  | 29.27 | 51.22    | 31.71 | 24.39   | 29.27 |
| 2 {41}          | 39.02   | 46.34 | 51.22  | 41.46 | 26.83    | 19.51 | 58.54   | 19.51 |
| 3 {30}          | 50.00   | 36.67 | 50.00  | 46.67 | 20.00    | 26.67 | 26.67   | 50.00 |
| 4 {49}          | 53.06   | 34.69 | 55.10  | 40.82 | 32.65    | 28.57 | 36.73   | 28.57 |
| 5 {16}          | 56.25   | 43.75 | 50.00  | 50.00 | 75.00    | 6.25  | 68.75   | 25.00 |
| All (1-5) {218} | 51.38   | 37.16 | 58.26  | 38.07 | 39.91    | 26.15 | 37.16   | 29.82 |
| CS              | TCoffee |       | MUSCLE |       | ProbCons |       | MUMMALS |       |
| 1V1 {38}        | 36.84   | 10.53 | 36.84  | 31.58 | 23.68    | 15.79 | 0.00    | 10.53 |
| 1V2 {44}        | 59.09   | 15.91 | 65.91  | 27.27 | 29.55    | 6.82  | 27.27   | 11.36 |
| 1 (V1-V2) {82}  | 48.78   | 13.41 | 52.44  | 29.27 | 26.83    | 10.98 | 14.63   | 10.98 |
| 2 {41}          | 48.78   | 4.88  | 41.46  | 21.95 | 9.76     | 7.32  | 26.83   | 12.20 |
| 3 {30}          | 36.67   | 20.00 | 40.00  | 33.33 | 13.33    | 6.67  | 26.67   | 16.67 |
| 4 {49}          | 38.78   | 14.29 | 36.73  | 20.41 | 16.33    | 10.20 | 18.37   | 12.24 |
| 5 {16}          | 50.00   | 25.00 | 50.00  | 31.25 | 25.00    | 12.50 | 37.50   | 12.50 |
| All (1-5) {218} | 44.95   | 13.76 | 44.95  | 26.61 | 19.27    | 9.63  | 21.10   | 12.39 |

Table S2: Percentage of cases in which the SPS and CS scores become better and worse on HOM-STRAD.

| SPS          | TCoffee |       | MUSCLE |       | ProbCons |       | MUMMALS |       |
|--------------|---------|-------|--------|-------|----------|-------|---------|-------|
| 0-20% {156}  | 41.03   | 30.13 | 59.62  | 31.41 | 62.82    | 22.44 | 28.85   | 16.67 |
| 20-40% {459} | 56.43   | 24.18 | 57.30  | 34.64 | 70.15    | 23.53 | 33.77   | 20.48 |
| 40-70% {348} | 41.67   | 14.94 | 42.24  | 28.74 | 53.74    | 20.98 | 28.45   | 17.24 |
| 70-100% {69} | 13.04   | 8.70  | 13.04  | 18.84 | 14.49    | 15.94 | 24.64   | 10.14 |
| All {1032}   | 46.22   | 20.93 | 49.61  | 31.10 | 59.79    | 22.00 | 30.62   | 18.12 |
| CS           | TCoffee |       | MUSCLE |       | ProbCons |       | MUMMALS |       |
| 0-20% {156}  | 44.23   | 25.00 | 55.77  | 33.97 | 60.26    | 21.79 | 23.72   | 15.38 |
| 20-40% {459} | 56.43   | 21.35 | 56.64  | 33.33 | 66.45    | 21.79 | 28.98   | 19.39 |
| 40-70% {348} | 39.94   | 12.64 | 41.67  | 27.59 | 50.86    | 19.83 | 27.59   | 13.22 |
| 70-100% {69} | 13.04   | 8.70  | 13.04  | 18.84 | 14.49    | 15.94 | 24.64   | 8.70  |
| All {1032}   | 46.12   | 18.12 | 48.55  | 30.52 | 56.78    | 20.74 | 27.42   | 15.99 |

Table S3: Percentage of cases in which the  $Q$  score becomes better and worse on PREFAB 4.0.

| $Q(2)$       | TCoffee |       | MUSCLE |       | ProbCons |       | MUMMALS |       |
|--------------|---------|-------|--------|-------|----------|-------|---------|-------|
| 0-20% {887}  | 28.30   | 18.60 | 43.86  | 28.07 | 48.70    | 18.15 | 13.53   | 8.79  |
| 20-40% {588} | 44.90   | 24.66 | 64.12  | 22.45 | 67.35    | 19.22 | 23.98   | 13.95 |
| 40-70% {112} | 26.79   | 10.71 | 33.93  | 27.68 | 48.21    | 12.50 | 23.21   | 8.93  |
| 70-100% {95} | 8.42    | 5.26  | 13.68  | 12.63 | 22.11    | 3.16  | 15.79   | 5.26  |
| All {1682}   | 32.88   | 19.44 | 48.57  | 25.21 | 53.69    | 17.30 | 17.95   | 10.40 |
| $Q(50)$      | TCoffee |       | MUSCLE |       | ProbCons |       | MUMMALS |       |
| 0-20% {887}  | 42.05   | 31.23 | 43.63  | 40.14 | 26.72    | 18.26 | 30.55   | 26.27 |
| 20-40% {588} | 48.81   | 33.84 | 47.28  | 41.67 | 33.84    | 14.63 | 37.41   | 29.93 |
| 40-70% {112} | 24.11   | 37.50 | 39.29  | 32.14 | 25.89    | 6.25  | 22.32   | 19.64 |
| 70-100% {95} | 18.95   | 13.68 | 23.16  | 13.68 | 16.84    | 1.05  | 17.89   | 5.26  |
| All {1682}   | 41.91   | 31.57 | 43.46  | 38.64 | 28.60    | 15.22 | 31.69   | 25.92 |

Table S4: Percentage of cases in which the  $f_D$  and  $f_M$  scores and the normalized Dali Z-score, GDT\_TS score, and ContactA and ContactB scores become better and worse on the Twilight and Superfamily subsets of SABmark 1.65.

| Twilight {205}    | TCoffee |       | MUSCLE |       | ProbCons |       | MUMMALS |       |
|-------------------|---------|-------|--------|-------|----------|-------|---------|-------|
| $f_D$             | 49.27   | 41.95 | 57.07  | 37.56 | 53.66    | 38.05 | 39.02   | 28.78 |
| $f_M$             | 43.90   | 50.24 | 54.15  | 40.49 | 43.41    | 50.73 | 44.39   | 31.22 |
| Dali Z-score      | 57.07   | 42.93 | 56.59  | 43.41 | 63.41    | 36.59 | 53.17   | 39.02 |
| GDT_TS            | 57.07   | 42.93 | 55.12  | 44.88 | 59.02    | 40.98 | 48.78   | 41.46 |
| ContactA          | 53.66   | 46.34 | 56.59  | 43.41 | 53.66    | 46.34 | 47.80   | 44.39 |
| ContactB          | 54.15   | 45.85 | 57.07  | 42.93 | 53.66    | 46.34 | 47.80   | 44.39 |
| Superfamily {422} | TCoffee |       | MUSCLE |       | ProbCons |       | MUMMALS |       |
| $f_D$             | 54.50   | 35.78 | 52.61  | 40.76 | 59.00    | 31.04 | 36.97   | 29.86 |
| $f_M$             | 53.32   | 39.10 | 52.37  | 41.71 | 50.24    | 41.71 | 40.52   | 31.52 |
| Dali Z-score      | 54.03   | 45.02 | 56.87  | 41.47 | 69.43    | 29.62 | 50.95   | 37.20 |
| GDT_TS            | 55.45   | 43.36 | 56.16  | 42.18 | 67.06    | 31.99 | 48.34   | 38.39 |
| ContactA          | 52.61   | 46.45 | 55.92  | 42.42 | 62.56    | 36.49 | 46.68   | 41.47 |
| ContactB          | 47.16   | 51.90 | 55.69  | 42.65 | 56.87    | 42.18 | 46.45   | 41.71 |

Table S5: Percentage of cases in which the SPS, CS and SCI scores become better and worse on Data-set 1 of BRAliBase II.

| SPS           | TCoffee |       | MUSCLE |       | ProbConsRNA |       |
|---------------|---------|-------|--------|-------|-------------|-------|
| 0-55% {96}    | 82.29   | 17.71 | 61.46  | 38.54 | 69.79       | 30.21 |
| 55-75% {218}  | 80.28   | 19.72 | 51.38  | 45.41 | 58.72       | 30.28 |
| 75-100% {167} | 39.52   | 35.33 | 28.74  | 33.53 | 43.11       | 23.35 |
| All {481}     | 66.53   | 24.74 | 45.53  | 39.92 | 55.51       | 27.86 |
| CS            | TCoffee |       | MUSCLE |       | ProbConsRNA |       |
| 0-55% {96}    | 65.62   | 28.12 | 56.25  | 35.42 | 54.17       | 35.42 |
| 55-75% {218}  | 80.28   | 16.51 | 49.08  | 40.37 | 50.92       | 29.36 |
| 75-100% {167} | 29.94   | 29.94 | 24.55  | 26.95 | 34.13       | 22.75 |
| All {481}     | 59.88   | 23.49 | 42.00  | 34.72 | 45.74       | 28.27 |
| SCI           | TCoffee |       | MUSCLE |       | ProbConsRNA |       |
| 0-55% {96}    | 77.08   | 8.33  | 56.25  | 28.12 | 77.08       | 8.33  |
| 55-75% {218}  | 80.28   | 12.39 | 50.00  | 32.11 | 80.28       | 12.39 |
| 75-100% {167} | 33.53   | 26.35 | 28.74  | 21.56 | 33.53       | 26.35 |
| All {481}     | 63.41   | 16.42 | 43.87  | 27.65 | 50.52       | 14.97 |

Table S6: Percentage of cases in which the  $Q$  score becomes better and worse on the mdsa\_all set of DNA PREFAB.

| $Q$           | TCoffee |       | MUSCLE |       | ProbConsRNA |      |
|---------------|---------|-------|--------|-------|-------------|------|
| 0-20% {123}   | 16.26   | 7.32  | 27.64  | 10.57 | 19.51       | 5.69 |
| 20-40% {1030} | 56.31   | 10.78 | 57.48  | 18.74 | 58.83       | 9.81 |
| 40-70% {436}  | 92.43   | 2.75  | 91.75  | 4.82  | 93.58       | 2.06 |
| 70-100% {87}  | 26.44   | 4.60  | 17.24  | 21.84 | 48.28       | 8.05 |
| All {1676}    | 61.22   | 8.11  | 62.11  | 14.68 | 64.44       | 7.40 |

Table S7: Percentage of cases in which the number of gaps in an alignment (num\_gap, a string of consecutive indels within a sequence is counted as one gap), the average length of gaps (len\_gap) and the length of the alignment (len\_aln) become smaller, larger and smaller respectively (the first number for each algorithm), and larger, smaller and larger respectively (the second number for each algorithm), on full length protein sequences in BALiBASE 3.0. For each algorithm, the third number is the  $p$ -value of the number of gaps in an alignment, the average length of gaps and the length of the alignment becoming smaller, larger and smaller respectively.

| num_gap         | TCoffee |       |                     | MUSCLE |       |                     | ProbCons |       |                     | MUMMALS |       |                     |
|-----------------|---------|-------|---------------------|--------|-------|---------------------|----------|-------|---------------------|---------|-------|---------------------|
| 1V1 {38}        | 92.11   | 0.00  |                     | 92.11  | 7.89  |                     | 94.74    | 0.00  |                     | 76.32   | 10.53 |                     |
| 1V2 {44}        | 95.45   | 0.00  |                     | 93.18  | 4.55  |                     | 86.36    | 6.82  |                     | 68.18   | 11.36 |                     |
| 1 (V1-V2) {82}  | 93.90   | 0.00  | $8 \times 10^{-15}$ | 92.68  | 6.10  | $8 \times 10^{-15}$ | 90.24    | 3.66  | $3 \times 10^{-13}$ | 71.95   | 10.98 | $8 \times 10^{-9}$  |
| 2 {41}          | 100.00  | 0.00  |                     | 92.68  | 7.32  |                     | 73.17    | 26.83 |                     | 60.98   | 36.59 |                     |
| 3 {30}          | 100.00  | 0.00  |                     | 96.67  | 3.33  |                     | 80.00    | 20.00 |                     | 46.67   | 50.00 |                     |
| 4 {49}          | 97.96   | 2.04  |                     | 95.92  | 4.08  |                     | 77.55    | 18.37 |                     | 75.51   | 20.41 |                     |
| 5 {16}          | 100.00  | 0.00  |                     | 100.00 | 0.00  |                     | 100.00   | 0.00  |                     | 93.75   | 6.25  |                     |
| All (1-5) {218} | 97.25   | 0.46  | $5 \times 10^{-37}$ | 94.50  | 5.05  | $8 \times 10^{-36}$ | 83.49    | 13.30 | $2 \times 10^{-21}$ | 68.81   | 22.94 | $2 \times 10^{-8}$  |
| len_gap         | TCoffee |       |                     | MUSCLE |       |                     | ProbCons |       |                     | MUMMALS |       |                     |
| 1V1 {38}        | 86.84   | 7.89  |                     | 92.11  | 7.89  |                     | 97.37    | 0.00  |                     | 68.42   | 15.79 |                     |
| 1V2 {44}        | 90.91   | 6.82  |                     | 88.64  | 9.09  |                     | 77.27    | 18.18 |                     | 65.91   | 13.64 |                     |
| 1 (V1-V2) {82}  | 89.02   | 7.32  | $2 \times 10^{-13}$ | 90.24  | 8.54  | $1 \times 10^{-11}$ | 86.59    | 9.76  | $6 \times 10^{-12}$ | 67.07   | 14.63 | $3 \times 10^{-6}$  |
| 2 {41}          | 100.00  | 0.00  |                     | 95.12  | 4.88  |                     | 70.73    | 29.27 |                     | 58.54   | 39.02 |                     |
| 3 {30}          | 96.67   | 3.33  |                     | 96.67  | 3.33  |                     | 70.00    | 30.00 |                     | 50.00   | 46.67 |                     |
| 4 {49}          | 97.96   | 2.04  |                     | 89.80  | 10.20 |                     | 75.51    | 22.45 |                     | 73.47   | 24.49 |                     |
| 5 {16}          | 87.50   | 12.50 |                     | 100.00 | 0.00  |                     | 87.50    | 12.50 |                     | 87.50   | 12.50 |                     |
| All (1-5) {218} | 94.04   | 4.59  | $6 \times 10^{-35}$ | 92.66  | 6.88  | $3 \times 10^{-31}$ | 78.90    | 19.27 | $9 \times 10^{-18}$ | 66.06   | 25.69 | $5 \times 10^{-11}$ |
| len_aln         | TCoffee |       |                     | MUSCLE |       |                     | ProbCons |       |                     | MUMMALS |       |                     |
| 1V1 {38}        | 76.32   | 7.89  |                     | 68.42  | 23.68 |                     | 76.32    | 10.53 |                     | 52.63   | 7.89  |                     |
| 1V2 {44}        | 75.00   | 2.27  |                     | 68.18  | 6.82  |                     | 68.18    | 18.18 |                     | 29.55   | 15.91 |                     |
| 1 (V1-V2) {82}  | 75.61   | 4.88  | $1 \times 10^{-10}$ | 68.29  | 14.63 | $3 \times 10^{-8}$  | 71.95    | 14.63 | $9 \times 10^{-9}$  | 40.24   | 12.20 | $5 \times 10^{-4}$  |
| 2 {41}          | 87.80   | 12.20 |                     | 73.17  | 21.95 |                     | 63.41    | 36.59 |                     | 51.22   | 31.71 |                     |
| 3 {30}          | 90.00   | 10.00 |                     | 80.00  | 20.00 |                     | 63.33    | 30.00 |                     | 50.00   | 43.33 |                     |
| 4 {49}          | 77.55   | 22.45 |                     | 65.31  | 32.65 |                     | 59.18    | 38.78 |                     | 63.27   | 28.57 |                     |
| 5 {16}          | 93.75   | 6.25  |                     | 75.00  | 12.50 |                     | 75.00    | 25.00 |                     | 62.50   | 25.00 |                     |
| All (1-5) {218} | 81.65   | 11.01 | $6 \times 10^{-22}$ | 70.64  | 20.64 | $5 \times 10^{-12}$ | 66.51    | 27.06 | $2 \times 10^{-6}$  | 50.46   | 24.77 | 0.008               |

Table S8: Percentage of cases in which the number of gaps in an alignment (num\_gap), the average length of gaps (len\_gap) and the length of the alignment (len\_aln) become smaller, larger and smaller respectively, and larger, smaller and larger respectively, on HOMSTRAD.

| num_gap      | TCoffee |      |                     | MUSCLE |      |                     | ProbCons |       |                     | MUMMALS |      |                     |
|--------------|---------|------|---------------------|--------|------|---------------------|----------|-------|---------------------|---------|------|---------------------|
| 0-20% {156}  | 42.31   | 0.00 | $6 \times 10^{-13}$ | 80.13  | 0.00 | $8 \times 10^{-23}$ | 75.00    | 1.92  | $2 \times 10^{-19}$ | 19.23   | 4.49 | $2 \times 10^{-4}$  |
| 20-40% {459} | 42.70   | 2.40 | $2 \times 10^{-33}$ | 60.78  | 3.49 | $8 \times 10^{-41}$ | 58.82    | 2.40  | $3 \times 10^{-41}$ | 16.99   | 4.36 | $2 \times 10^{-7}$  |
| 40-70% {348} | 21.26   | 2.01 | $5 \times 10^{-13}$ | 30.75  | 0.57 | $4 \times 10^{-19}$ | 27.59    | 1.44  | $3 \times 10^{-15}$ | 11.21   | 3.16 | $3 \times 10^{-4}$  |
| 70-100% {69} | 5.80    | 0.00 | —                   | 2.90   | 0.00 | —                   | 2.90     | 0.00  | —                   | 1.45    | 0.00 | —                   |
| All {1032}   | 32.95   | 1.74 | $3 \times 10^{-56}$ | 49.71  | 1.74 | $2 \times 10^{-78}$ | 47.00    | 1.84  | $5 \times 10^{-72}$ | 14.34   | 3.68 | $6 \times 10^{-13}$ |
| len_gap      | TCoffee |      |                     | MUSCLE |      |                     | ProbCons |       |                     | MUMMALS |      |                     |
| 0-20% {156}  | 37.82   | 5.13 | $5 \times 10^{-8}$  | 72.44  | 9.62 | $8 \times 10^{-19}$ | 67.95    | 11.54 | $1 \times 10^{-15}$ | 17.95   | 7.05 | $9 \times 10^{-4}$  |
| 20-40% {459} | 40.09   | 4.79 | $1 \times 10^{-26}$ | 55.99  | 9.80 | $8 \times 10^{-34}$ | 55.56    | 5.88  | $3 \times 10^{-39}$ | 14.81   | 6.75 | $2 \times 10^{-5}$  |
| 40-70% {348} | 20.69   | 2.87 | $3 \times 10^{-9}$  | 26.72  | 5.46 | $3 \times 10^{-14}$ | 26.72    | 1.72  | $7 \times 10^{-15}$ | 10.06   | 5.17 | 0.004               |
| 70-100% {69} | 5.80    | 0.00 | —                   | 1.45   | 2.90 | —                   | 2.90     | 0.00  | —                   | 1.45    | 0.00 | —                   |
| All {1032}   | 30.91   | 3.88 | $6 \times 10^{-41}$ | 44.96  | 7.85 | $3 \times 10^{-62}$ | 44.19    | 4.94  | $2 \times 10^{-64}$ | 12.79   | 5.81 | $3 \times 10^{-9}$  |
| len_aln      | TCoffee |      |                     | MUSCLE |      |                     | ProbCons |       |                     | MUMMALS |      |                     |
| 0-20% {156}  | 26.92   | 5.13 | $3 \times 10^{-5}$  | 56.41  | 8.97 | $8 \times 10^{-12}$ | 55.13    | 3.21  | $4 \times 10^{-14}$ | 8.33    | 3.21 | —                   |
| 20-40% {459} | 20.26   | 2.18 | $6 \times 10^{-14}$ | 37.91  | 6.75 | $8 \times 10^{-18}$ | 34.42    | 2.83  | $3 \times 10^{-23}$ | 7.19    | 1.09 | $5 \times 10^{-6}$  |
| 40-70% {348} | 7.47    | 0.00 | $2 \times 10^{-6}$  | 14.94  | 2.01 | $3 \times 10^{-9}$  | 9.20     | 1.15  | $3 \times 10^{-5}$  | 4.31    | 1.72 | 0.006               |
| 70-100% {69} | 1.45    | 0.00 | —                   | 2.90   | 0.00 | —                   | 0.00     | 0.00  | —                   | 0.00    | 0.00 | —                   |
| All {1032}   | 15.70   | 1.74 | $9 \times 10^{-21}$ | 30.62  | 5.04 | $1 \times 10^{-34}$ | 26.74    | 2.13  | $3 \times 10^{-39}$ | 5.91    | 1.55 | $1 \times 10^{-7}$  |

Table S9: Percentage of cases in which the number of gaps in an alignment (num\_gap), the average length of gaps (len\_gap) and the length of the alignment (len\_aln) become smaller, larger and smaller respectively, and larger, smaller and larger respectively, on PREFAB 4.0. (a) Only the original input protein sequence pair are aligned. (b) The full set of protein sequences (at most 50) that also include random hits from database search are aligned.

| num_gap(2)   | TCoffee |      |                     | MUSCLE |       |                      | ProbCons |      |                      | MUMMALS |      |                     |
|--------------|---------|------|---------------------|--------|-------|----------------------|----------|------|----------------------|---------|------|---------------------|
| 0-20% {887}  | 20.41   | 0.56 | $9 \times 10^{-33}$ | 81.06  | 0.34  | $1 \times 10^{-120}$ | 73.73    | 0.11 | $5 \times 10^{-111}$ | 10.03   | 0.56 | $2 \times 10^{-17}$ |
| 20-40% {588} | 27.89   | 0.51 | $9 \times 10^{-31}$ | 57.99  | 0.17  | $2 \times 10^{-59}$  | 51.53    | 0.00 | $1 \times 10^{-53}$  | 6.80    | 0.17 | $2 \times 10^{-9}$  |
| 40-70% {112} | 2.68    | 0.00 | —                   | 13.39  | 0.00  | $6 \times 10^{-5}$   | 13.39    | 0.00 | $9 \times 10^{-5}$   | 8.04    | 0.89 | 0.007               |
| 70-100% {95} | 3.16    | 0.00 | —                   | 3.16   | 0.00  | —                    | 5.26     | 0.00 | 0.03                 | 3.16    | 0.00 | —                   |
| All {1682}   | 20.87   | 0.48 | $2 \times 10^{-62}$ | 64.09  | 0.24  | $2 \times 10^{-180}$ | 58.09    | 0.06 | $1 \times 10^{-165}$ | 8.38    | 0.42 | $8 \times 10^{-27}$ |
| len_gap(2)   | TCoffee |      |                     | MUSCLE |       |                      | ProbCons |      |                      | MUMMALS |      |                     |
| 0-20% {887}  | 18.94   | 2.82 | $8 \times 10^{-23}$ | 76.89  | 6.88  | $9 \times 10^{-106}$ | 69.90    | 4.85 | $2 \times 10^{-95}$  | 9.70    | 1.47 | $2 \times 10^{-14}$ |
| 20-40% {588} | 27.89   | 1.36 | $2 \times 10^{-25}$ | 50.34  | 8.16  | $2 \times 10^{-42}$  | 45.58    | 5.27 | $5 \times 10^{-38}$  | 6.46    | 0.51 | $1 \times 10^{-6}$  |
| 40-70% {112} | 2.68    | 0.00 | —                   | 10.71  | 2.68  | 0.002                | 9.82     | 2.68 | 0.009                | 6.25    | 4.46 | —                   |
| 70-100% {95} | 3.16    | 0.00 | —                   | 3.16   | 0.00  | —                    | 4.21     | 2.11 | —                    | 3.16    | 0.00 | —                   |
| All {1682}   | 20.10   | 1.96 | $2 \times 10^{-46}$ | 59.04  | 6.66  | $7 \times 10^{-150}$ | 53.69    | 4.70 | $3 \times 10^{-133}$ | 7.97    | 1.25 | $3 \times 10^{-19}$ |
| len_aln(2)   | TCoffee |      |                     | MUSCLE |       |                      | ProbCons |      |                      | MUMMALS |      |                     |
| 0-20% {887}  | 10.37   | 1.24 | $7 \times 10^{-12}$ | 47.01  | 10.15 | $2 \times 10^{-39}$  | 41.83    | 1.69 | $3 \times 10^{-53}$  | 2.37    | 0.11 | $3 \times 10^{-5}$  |
| 20-40% {588} | 6.12    | 1.36 | $1 \times 10^{-5}$  | 31.97  | 2.21  | $9 \times 10^{-29}$  | 30.27    | 0.17 | $7 \times 10^{-31}$  | 1.53    | 0.00 | 0.004               |
| 40-70% {112} | 0.00    | 0.00 | —                   | 5.36   | 0.89  | —                    | 6.25     | 0.00 | 0.01                 | 7.14    | 0.89 | 0.01                |
| 70-100% {95} | 0.00    | 0.00 | —                   | 0.00   | 0.00  | —                    | 5.26     | 0.00 | 0.03                 | 1.05    | 0.00 | —                   |
| All {1682}   | 7.61    | 1.13 | $5 \times 10^{-16}$ | 36.33  | 6.18  | $2 \times 10^{-63}$  | 33.35    | 0.95 | $2 \times 10^{-83}$  | 2.32    | 0.12 | $3 \times 10^{-8}$  |

(a)

| num_gap(50)  | TCoffee |      |                      | MUSCLE |       |                      | ProbCons |       |                      | MUMMALS |       |                     |
|--------------|---------|------|----------------------|--------|-------|----------------------|----------|-------|----------------------|---------|-------|---------------------|
| 0-20% {887}  | 96.17   | 1.35 | $1 \times 10^{-142}$ | 91.43  | 6.65  | $1 \times 10^{-131}$ | 73.84    | 20.63 | $5 \times 10^{-70}$  | 60.20   | 33.60 | $6 \times 10^{-19}$ |
| 20-40% {588} | 95.75   | 1.53 | $4 \times 10^{-95}$  | 88.27  | 7.48  | $2 \times 10^{-84}$  | 71.09    | 21.09 | $5 \times 10^{-40}$  | 59.52   | 34.01 | $2 \times 10^{-10}$ |
| 40-70% {112} | 88.39   | 2.68 | $1 \times 10^{-18}$  | 72.32  | 10.71 | $4 \times 10^{-15}$  | 58.04    | 18.75 | $8 \times 10^{-7}$   | 60.71   | 30.36 | $1 \times 10^{-4}$  |
| 70-100% {95} | 76.84   | 4.21 | $3 \times 10^{-14}$  | 63.16  | 9.47  | $4 \times 10^{-11}$  | 58.95    | 13.68 | $5 \times 10^{-6}$   | 51.58   | 25.26 | 0.004               |
| All {1682}   | 94.41   | 1.66 | $7 \times 10^{-264}$ | 87.46  | 7.37  | $4 \times 10^{-236}$ | 70.99    | 20.27 | $1 \times 10^{-116}$ | 59.51   | 33.06 | $2 \times 10^{-31}$ |
| len_gap(50)  | TCoffee |      |                      | MUSCLE |       |                      | ProbCons |       |                      | MUMMALS |       |                     |
| 0-20% {887}  | 89.29   | 8.34 | $3 \times 10^{-121}$ | 85.34  | 13.08 | $1 \times 10^{-97}$  | 63.36    | 29.88 | $2 \times 10^{-28}$  | 57.05   | 36.41 | $3 \times 10^{-12}$ |
| 20-40% {588} | 91.50   | 5.10 | $1 \times 10^{-85}$  | 82.65  | 12.76 | $4 \times 10^{-67}$  | 59.86    | 30.61 | $5 \times 10^{-14}$  | 55.27   | 37.59 | $6 \times 10^{-5}$  |
| 40-70% {112} | 81.25   | 9.82 | $9 \times 10^{-17}$  | 69.64  | 13.39 | $1 \times 10^{-11}$  | 45.54    | 31.25 | 0.01                 | 51.79   | 38.39 | 0.02                |
| 70-100% {95} | 72.63   | 8.42 | $1 \times 10^{-12}$  | 53.68  | 17.89 | $4 \times 10^{-7}$   | 45.26    | 27.37 | 0.008                | 49.47   | 25.26 | 0.005               |
| All {1682}   | 88.59   | 7.31 | $6 \times 10^{-229}$ | 81.57  | 13.26 | $5 \times 10^{-177}$ | 59.93    | 30.08 | $3 \times 10^{-42}$  | 55.65   | 36.33 | $1 \times 10^{-17}$ |
| len_aln(50)  | TCoffee |      |                      | MUSCLE |       |                      | ProbCons |       |                      | MUMMALS |       |                     |
| 0-20% {887}  | 88.39   | 4.51 | $9 \times 10^{-119}$ | 72.94  | 15.11 | $2 \times 10^{-65}$  | 55.13    | 26.83 | $7 \times 10^{-19}$  | 47.24   | 25.70 | $9 \times 10^{-11}$ |
| 20-40% {588} | 88.10   | 1.36 | $1 \times 10^{-83}$  | 70.58  | 9.86  | $2 \times 10^{-52}$  | 52.04    | 26.36 | $3 \times 10^{-12}$  | 45.41   | 20.58 | $2 \times 10^{-12}$ |
| 40-70% {112} | 83.93   | 0.89 | $3 \times 10^{-17}$  | 54.46  | 14.29 | $4 \times 10^{-6}$   | 50.89    | 16.07 | $8 \times 10^{-6}$   | 46.43   | 17.86 | 0.001               |
| 70-100% {95} | 64.21   | 3.16 | $4 \times 10^{-10}$  | 51.58  | 7.37  | $5 \times 10^{-9}$   | 45.26    | 12.63 | $6 \times 10^{-4}$   | 33.68   | 12.63 | 0.003               |
| All {1682}   | 86.62   | 3.09 | $1 \times 10^{-221}$ | 69.68  | 12.78 | $1 \times 10^{-123}$ | 53.21    | 25.15 | $9 \times 10^{-35}$  | 45.78   | 22.65 | $1 \times 10^{-23}$ |

(b)

Table S10: Percentage of cases in which the number of gaps in an alignment (num\_gap), the average length of gaps (len\_gap) and the length of the alignment (len\_aln) become smaller, larger and smaller respectively, and larger, smaller and larger respectively, on the Twilight and Superfamily subsets of SABmark 1.65.

| Twilight {205}    | TCoffee |       |                     | MUSCLE |       |                     | ProbCons |       |                     | MUMMALS |       |                     |
|-------------------|---------|-------|---------------------|--------|-------|---------------------|----------|-------|---------------------|---------|-------|---------------------|
| num_gap           | 84.69   | 7.66  | $8 \times 10^{-28}$ | 85.17  | 7.18  | $1 \times 10^{-27}$ | 85.65    | 7.18  | $8 \times 10^{-27}$ | 50.72   | 20.57 | $2 \times 10^{-6}$  |
| len_gap           | 68.42   | 23.92 | $1 \times 10^{-11}$ | 75.12  | 19.62 | $5 \times 10^{-23}$ | 76.08    | 17.70 | $3 \times 10^{-21}$ | 50.24   | 24.88 | $3 \times 10^{-6}$  |
| len_aln           | 66.51   | 13.88 | $5 \times 10^{-14}$ | 56.94  | 30.62 | $5 \times 10^{-5}$  | 61.24    | 20.57 | $3 \times 10^{-7}$  | 33.01   | 21.05 | 0.02                |
| Superfamily {422} | TCoffee |       |                     | MUSCLE |       |                     | ProbCons |       |                     | MUMMALS |       |                     |
| num_gap           | 79.06   | 4.71  | $7 \times 10^{-52}$ | 82.12  | 4.47  | $2 \times 10^{-56}$ | 76.00    | 6.35  | $5 \times 10^{-47}$ | 44.71   | 16.94 | $7 \times 10^{-11}$ |
| len_gap           | 72.00   | 12.71 | $2 \times 10^{-34}$ | 76.71  | 12.00 | $2 \times 10^{-44}$ | 72.24    | 10.59 | $1 \times 10^{-42}$ | 41.41   | 20.71 | $4 \times 10^{-8}$  |
| len_aln           | 53.65   | 7.76  | $6 \times 10^{-26}$ | 57.41  | 19.53 | $1 \times 10^{-17}$ | 53.18    | 12.47 | $7 \times 10^{-18}$ | 26.59   | 12.00 | $6 \times 10^{-5}$  |

Table S11: Percentage of cases in which the number of gaps in an alignment (num\_gap), the average length of gaps (len\_gap) and the length of the alignment (len\_aln) become smaller, larger and smaller respectively, and larger, smaller and larger respectively, on Data-set 1 of BRAlIbase II.

| num_gap       | TCoffee |       |                     | MUSCLE |       |                     | ProbConsRNA |      |                     |
|---------------|---------|-------|---------------------|--------|-------|---------------------|-------------|------|---------------------|
| 0-55% {96}    | 98.96   | 0.00  | $9 \times 10^{-18}$ | 77.08  | 7.29  | $2 \times 10^{-13}$ | 89.58       | 3.12 | $4 \times 10^{-16}$ |
| 55-75% {218}  | 96.79   | 0.00  | $7 \times 10^{-37}$ | 66.06  | 4.59  | $8 \times 10^{-26}$ | 73.39       | 0.92 | $3 \times 10^{-28}$ |
| 75-100% {167} | 46.11   | 1.20  | $1 \times 10^{-14}$ | 20.36  | 0.60  | $2 \times 10^{-7}$  | 29.94       | 1.20 | $4 \times 10^{-10}$ |
| All {481}     | 79.63   | 0.42  | $5 \times 10^{-65}$ | 52.39  | 3.74  | $2 \times 10^{-42}$ | 61.54       | 1.46 | $1 \times 10^{-50}$ |
| len_gap       | TCoffee |       |                     | MUSCLE |       |                     | ProbConsRNA |      |                     |
| 0-55% {96}    | 90.62   | 8.33  | $5 \times 10^{-15}$ | 48.96  | 38.54 | —                   | 83.33       | 8.33 | $1 \times 10^{-14}$ |
| 55-75% {218}  | 65.14   | 26.15 | $1 \times 10^{-9}$  | 41.28  | 29.82 | —                   | 68.35       | 6.42 | $1 \times 10^{-23}$ |
| 75-100% {167} | 30.54   | 13.77 | $4 \times 10^{-4}$  | 16.77  | 3.59  | $2 \times 10^{-4}$  | 25.75       | 4.19 | $9 \times 10^{-8}$  |
| All {481}     | 58.21   | 18.30 | $1 \times 10^{-25}$ | 34.30  | 22.45 | 0.005               | 56.55       | 6.03 | $2 \times 10^{-42}$ |
| len_aln       | TCoffee |       |                     | MUSCLE |       |                     | ProbConsRNA |      |                     |
| 0-55% {96}    | 89.58   | 4.17  | $3 \times 10^{-15}$ | 68.75  | 9.38  | $2 \times 10^{-9}$  | 63.54       | 5.21 | $6 \times 10^{-11}$ |
| 55-75% {218}  | 92.66   | 0.46  | $2 \times 10^{-35}$ | 55.50  | 3.21  | $6 \times 10^{-19}$ | 53.21       | 2.29 | $5 \times 10^{-21}$ |
| 75-100% {167} | 35.33   | 0.00  | $4 \times 10^{-12}$ | 8.98   | 0.00  | $3 \times 10^{-4}$  | 17.37       | 0.00 | $4 \times 10^{-7}$  |
| All {481}     | 72.14   | 1.04  | $8 \times 10^{-58}$ | 42.00  | 3.33  | $2 \times 10^{-28}$ | 42.83       | 2.08 | $6 \times 10^{-35}$ |

Table S12: Percentage of cases in which the number of gaps in an alignment (num\_gap), the average length of gaps (len\_gap) and the length of the alignment (len\_aln) become smaller, larger and smaller respectively, and larger, smaller and larger respectively, on the mdsa\_all set of DNA PREFAB.

| num_gap       | TCoffee |      |                      | MUSCLE |       |                      | ProbConsRNA |      |                      |
|---------------|---------|------|----------------------|--------|-------|----------------------|-------------|------|----------------------|
| 0-20% {123}   | 100.00  | 0.00 | $2 \times 10^{-22}$  | 100.00 | 0.00  | $2 \times 10^{-22}$  | 100.00      | 0.00 | $2 \times 10^{-22}$  |
| 20-40% {1030} | 100.00  | 0.00 | $1 \times 10^{-170}$ | 100.00 | 0.00  | $1 \times 10^{-170}$ | 100.00      | 0.00 | $1 \times 10^{-170}$ |
| 40-70% {436}  | 97.94   | 0.00 | $3 \times 10^{-72}$  | 95.18  | 0.00  | $4 \times 10^{-70}$  | 96.79       | 0.00 | $2 \times 10^{-71}$  |
| 70-100% {87}  | 21.84   | 0.00 | $6 \times 10^{-5}$   | 13.79  | 0.00  | $6 \times 10^{-4}$   | 25.29       | 0.00 | $2 \times 10^{-5}$   |
| All {1676}    | 95.41   | 0.00 | $3 \times 10^{-263}$ | 94.27  | 0.00  | $4 \times 10^{-260}$ | 95.29       | 0.00 | $7 \times 10^{-263}$ |
| len_gap       | TCoffee |      |                      | MUSCLE |       |                      | ProbConsRNA |      |                      |
| 0-20% {123}   | 100.00  | 0.00 | $2 \times 10^{-22}$  | 100.00 | 0.00  | $2 \times 10^{-22}$  | 100.00      | 0.00 | $2 \times 10^{-22}$  |
| 20-40% {1030} | 100.00  | 0.00 | $1 \times 10^{-170}$ | 95.73  | 4.27  | $2 \times 10^{-166}$ | 99.90       | 0.10 | $2 \times 10^{-170}$ |
| 40-70% {436}  | 96.33   | 1.15 | $1 \times 10^{-71}$  | 85.55  | 9.17  | $7 \times 10^{-61}$  | 94.95       | 1.61 | $7 \times 10^{-71}$  |
| 70-100% {87}  | 19.54   | 2.30 | $2 \times 10^{-4}$   | 13.79  | 0.00  | 0.001                | 25.29       | 0.00 | $2 \times 10^{-5}$   |
| All {1676}    | 94.87   | 0.42 | $3 \times 10^{-262}$ | 89.14  | 5.01  | $3 \times 10^{-249}$ | 94.75       | 0.48 | $2 \times 10^{-262}$ |
| len_aln       | TCoffee |      |                      | MUSCLE |       |                      | ProbConsRNA |      |                      |
| 0-20% {123}   | 85.37   | 9.76 | $3 \times 10^{-17}$  | 87.80  | 10.57 | $7 \times 10^{-18}$  | 91.06       | 4.07 | $7 \times 10^{-18}$  |
| 20-40% {1030} | 86.12   | 6.89 | $9 \times 10^{-132}$ | 82.72  | 13.79 | $1 \times 10^{-114}$ | 83.20       | 4.85 | $1 \times 10^{-128}$ |
| 40-70% {436}  | 88.99   | 2.75 | $1 \times 10^{-61}$  | 86.47  | 4.82  | $4 \times 10^{-60}$  | 81.88       | 2.29 | $4 \times 10^{-57}$  |
| 70-100% {87}  | 10.34   | 1.15 | 0.006                | 2.30   | 1.15  | —                    | 2.30        | 0.00 | —                    |
| All {1676}    | 82.88   | 5.73 | $2 \times 10^{-207}$ | 79.89  | 10.56 | $3 \times 10^{-188}$ | 79.24       | 3.88 | $4 \times 10^{-199}$ |
